# Supplementary material for: A comparison of the impact of TROPOMI and OMI tropospheric NO 2 on global chemical data assimilation
Source: Copernicus journal article supplement (doi:10.5194/amt-2021-400), 2021-12-02
Supplement: Supplementary file [file amt-2021-400-AC1-supplement.pdf]

## A comparison of the impact of TROPOMI and OMI tropospheric NO<sub>2</sub> on global chemical data assimilation: Reply to comments from anonymous referee #1

We would like to thank anonymous referee #1 for his or her careful reading and valuable comments, which have helped to significantly improve the manuscript. We have revised the manuscript corresponding to the referee's comments. Main changes we made are as follows:

- 1) Appendix A was added to discuss the seasonally varying bias of TROPOMI NO<sub>2</sub>.
- 2) The discussion on the potential impacts of a low bias of TROPOMI in winter on the DA performance was added to Section 6.
- 3) The comparison of surface NO<sub>2</sub> concentrations derived from the control model simulation, TROPOMI DA, and OMI DA was added to Figure 9.

Individual comments (in black) and specific responses to them (in blue) are listed below. Texts (*Italicized font*) from the revised manuscript are in quotes.

To discuss the potential impacts of the TROPOMI retrieval algorithm updates, the submitted manuscript compared TROPOMI NO<sub>2</sub> version 1.2.2 product during September 2018 with version 2.2 product during September 2021 in Appendix A. At that time, the version 2.2 product was not available for April–May 2018. We noted that this comparison for different periods makes it difficult to distinguish the impacts of the algorithm updates from those of inter-annual changes. After the paper submission, the S5P-PAL reprocessing product became available for May 2018–July 2021. To provide more a consistent comparison for the same time period, we have revised Appendix B (corresponding to Appendix A of the submitted manuscript) to the comparison between version 1.2beta and S5P-PAL reprocessing products for May 2018. Although this change was not requested by the referees, we think that this update provides a better implication for the impacts of algorithm updates. The paragraph has been revised as follows:

(p. 41, l. 793–809)

*“In the latest version of the TROPOMI NO<sub>2</sub> product, the low bias compared to OMI QA4ECV is largely improved from the previous versions (van Geffen et al., 2021). To discuss the potential impacts of the retrieval algorithm updates on the DA performance, Figure B1 compares global distributions of tropospheric NO<sub>2</sub> column, super-observation errors, and relative super-observation errors (i.e., errors divided by concentrations) obtained from the TROPOMI version 1.2beta product, that was used in this study, and S5P-PAL reprocessing product (processed with same processor as version 2.3.1), that was released more recently, for May 2018. The S5P-PAL reprocessing product data were obtained from the S5P-PAL data portal (<https://data-portal.s5p-pal.com>). The algorithm updates from versions 1.2 to 2.3 led to increases in tropospheric NO<sub>2</sub> column amounts typically by 6% over polluted areas due to the algorithm updates from versions 1.2 to 2.3. These increases are mainly attributable to the improved*

*FRESCO cloud retrievals (van Geffen et al., 2021). In contrast, the relative super-observation errors over most regions except for the southern mid-latitudes are comparable between the products, with less than 0.2% differences in the mean relative super-observation error over 60°N–60°S. These differences are much smaller than the differences between the TROPOMI version 1.2beta and OMI QA4ECV products (by 19% in May 2018).*

*The improved TROPOMI retrievals would reduce the negative bias of the NO<sub>2</sub> concentration analysis compared to OMI and increase the estimated NO<sub>x</sub> emissions for areas with weak chemical non-linearity. The increase in NO<sub>x</sub> emissions would reduce the negative biases in ozone analysis under NO<sub>x</sub>-limited ozone chemical regime. Meanwhile, the relative super-observation errors of TROPOMI retrievals were almost identical between versions 1.2beta and 2.3.1. This suggests that the DA efficiency, for example, to constrain detailed temporal and spatial variations, might not be largely affected by the algorithm updates.”*

In this manuscript, the authors present a systematic comparison of the Tropospheric Monitoring Instrument (TROPOMI) version 1.2 and Ozone Monitoring Instrument (OMI) QA4ECV tropospheric NO<sub>2</sub> column through global chemical data assimilation (DA) integration. The comparison of the impact of TROPOMI and OMI tropospheric NO<sub>2</sub> on global chemical data assimilation is comprehensive. The topic of the manuscript fits the scope of AMT. The manuscript is mostly well written. However, some details of observation data and discussions are needed. The paper can be published after some minor revisions.

We appreciate careful reviews again.

The study is based on only two months (the period April–May 2018). To my knowledge, TROPOMI has strong negative bias in wintertime. If the study is conducted for the winter period or other months, will the conclusion be different? The discussion is missing in the paper.

Thank you for the important comments.

In the submitted manuscript, the following explanations were added to describe the potential impact of TROPOMI low biases compared to OMI on the validation results and top-down NO<sub>x</sub> emission estimates for April–May 2018 in the manuscript as follows:

(Section 3.3.2, p. 10, l. 306–307)

*“These results suggest that the results of TROPOMI DA were affected by the TROPOMI low bias compared to OMI, ...”*

(Section 4, p. 12, l. 358—359)

*“These differences reflect the low bias of TROPOMI retrievals compared to OMI retrievals.”*

(Section 4, p. 13, l. 381—383)

*“Overall, these results imply that top-down NO<sub>x</sub> emission estimates using TROPOMI version 1.2-1.3 products could be affected by the TROPOMI low biases compared to OMI, while ...”*

(Section 5.1, p. 14, l. 418—420)

*“Meanwhile, any biases in satellite NO<sub>2</sub> retrievals will affect the surface ozone analysis. Surface ozone analysis biases are expected to be increased for a NO<sub>x</sub>-limited ozone chemical regime when using updated retrievals with reduced TROPOMI NO<sub>2</sub> negative bias.”*

The main reasons for discussing the April—May 2018 period only are that (1) many aircraft-campaign observations are available and (2) there is an active ozone photochemical production during this time period. Meanwhile, as pointed out by the referee, the TROPOMI bias impact can be different in other seasons. Although it was not feasible to add a detailed evaluation for winter seasons in this study, we have added a figure and explanations to Appendix A and Section 6 to explore the potential impact of the larger TROPOMI biases in winter as follows:

(Section 6, p. 15, l. 465—472)

*“The systematic differences of TROPOMI version 1.2 compared to ground-based remote sensing and OMI are larger in winter than in other seasons over the polluted regions (Verhoelst et al., 2020; van Geffen et al., 2021; Lambert et al., 2021), consistent with Appendix A. The influence of negative biases related to the a-priori profile shape are mostly removed by using averaging kernels. However, because of the larger TROPOMI (version 1.2) negative bias compared to OMI in winter than in April-May, the relative DA performance between TROPOMI and OMI will depend on the season, especially over heavily polluted areas. Because of the availability of aircraft-campaign observational data for validation and the active photochemical production during the target period, this study focused on April–May 2018 only, and the impact of seasonally varying relative biases between OMI and TROPOMI has not been investigated.”*

(Section 6, p. 15, l. 476—482)

*“Lambert et al. (2021) and van Geffen et al. (2021) reported that the negative biases of the updated TROPOMI retrieval (versions 1.4.x and 2.x) compared to OMI are reduced to within 10%. Assuming a remaining bias of 10% compared to OMI, the improved TROPOMI retrievals would increase the estimated NO<sub>x</sub> emissions by 10–30% over Europe and eastern China in winter, compared to the DA using TROPOMI version 1.2beta. The increase in NO<sub>x</sub> emissions would reduce negative ozone biases*

*in the DA analysis for a NO<sub>x</sub>-limited ozone chemical regime. Further investigations on the impacts of the seasonally varying retrieval biases would provide more detailed insights into the relative performance of TROPOMI and OMI DA.”*

(Appendix A, p. 40, l. 781—791)

*“As shown in Figure A1, the negative biases in TROPOMI tropospheric NO<sub>2</sub> column compared to OMI are larger in December 2018–February 2019 (by 25%, 19%, and 26% over Europe, the United States, and China, respectively) than in April–May 2018 (by 10%, 17%, and 16% over Europe, the United States, and China, respectively). In contrast, the differences in super-observation errors between TROPOMI and OMI are relatively constant over time. The differences in the relative super-observation errors (i.e., errors divided by concentrations) obtained from TROPOMI and OMI are smaller in winter than in other seasons over Europe and China because of the larger bias of the TROPOMI tropospheric NO<sub>2</sub> column compared to OMI in winter than in other seasons.*

*The strong negative biases in TROPOMI retrievals in winter would increase the negative bias in NO<sub>2</sub> concentration analysis and reduce the estimated NO<sub>x</sub> emissions. Meanwhile, these differences in relative super-observation errors of TROPOMI retrievals between winter and other seasons suggests that TROPOMI DA might provide less constraints on spatial and temporal variations in NO<sub>2</sub> even in winter than other seasons, and would still better constraints than OMI DA.”*

As discussed above and in the revised manuscript carefully, the TROPOMI (version 1.2beta) negative bias compared to OMI has been greatly reduced in the latest reprocessed product (version 2.3.1) that was released in December after this work was conducted. In addition, aircraft-campaign validation data are limited, and the ozone photochemical production is inactive in winter. Therefore, while discussing its potential impact in the revised manuscript, we think that it is not essential to add a detailed evaluation result on impacts of the wintertime negative bias on DA using the TROPOMI version 1.2.x product in this study.

Specific comments:

L71: typo: rfraction to fraction.

Modified

L88-93 section 2.2.1, can you please provide more details about the NO<sub>2</sub> observations in the Atom aircraft-campaign? Such as: what is the time window of the no<sub>2</sub> observations on each day? The frequency of the no<sub>2</sub> observations, per minute? Per hour?

We added the description on NO<sub>2</sub> measurements in ATom aircraft-campaign including time window, as follows:

(p. 4, l. 91—94)

*“The NO<sub>2</sub> concentrations were measured via the NOAA NOyO3 4-channel chemiluminescence instrument per 1 second with precision of 5–10 pptv (<https://espoarchive.nasa.gov/instrument/NOyO3>). The merged dataset of flight data with 10-second means was used for the validation.”*

L169: spatial representativeness error, should it be  $\sqrt{\sigma_m^2 + \sigma_r^2}$ ?

This part was modified.

L 265-261: How did you compare the vertical profiles between aircraft measurements to the model simulation? Can you give more details? Did you average the profiles over the area?

More detailed descriptions on comparison method and area definition were added.

(p. 9, l. 268—271)

*“... over coastal areas of the western United States (117.25–122.5°W, 32–37°N). At first the control model simulation and data assimilation results were sampled at observation locations, and then the observation data, the control model simulation, and the data assimilation were averaged on each day over the coastal areas of the western United State.”*

L417-450: The study time period of the data assimilation is April-May not the whole year. Please mention this in the conclusion. If you get the same conclusions or not when you include winter period. It could be nice that you can add some discussion here.

Please see our reply above.

L426: It is not accurate to conclude the global change of NO<sub>x</sub> emissions per year. Please rephrase the sentence or mention the time period.

We mentioned the time period for this study:

(p. 15, l. 448)

*“Global total NO<sub>x</sub> emission for April 15–May 31 2018 was increased ...”*
